# Supplementary material for: Machine learning-accelerated discovery of multi-cation entropy-stabilized NASICON solid electrolytes with 10 000 hours of stable Na plating/stripping for all-solid-state sodium batteries
Source: Royal Society of Chemistry journal article supplement (doi:10.1039/d5ee06594a), 2026-01-01
Supplement: d5ee06594a1.pdf [file d5ee06594a1.pdf]

## Supporting Information

### Machine Learning-Accelerated Discovery of Multi-Cation Entropy-Stabilized NASICON Solid Electrolytes with 10,000 Hours of Stable Na Plating/Stripping for All-Solid-State Sodium Batteries

**Authors:** Daxian Zuo,<sup>‡ab</sup> Jiaming Tian,<sup>‡a</sup> Yu Sun,<sup>‡a</sup> Xin Yu,<sup>a</sup> Bo Peng,<sup>a</sup> Tao Yu,<sup>ab</sup> Chengrong Xu,<sup>ab</sup> Xiangqun Xu,<sup>ab</sup> Yigang Wang,<sup>a</sup> Yiwen Liu,<sup>a</sup> Tianze Shi,<sup>a</sup> Yinhui Feng,<sup>a</sup> Jie Yang,<sup>a</sup> Haoshen Zhou<sup>a</sup>, and Shaohua Guo<sup>\*ab</sup>

#### Address:

<sup>a</sup> College of Engineering and Applied Sciences, Jiangsu Key Laboratory of Artificial Functional Materials, National Laboratory of Solid-State Microstructures, Collaborative Innovation Center of Advanced Microstructures, Nanjing University, Nanjing, 210093, China

<sup>b</sup> Lab of Power and Energy Storage Batteries, Shenzhen Research Institute of Nanjing University, Shenzhen, 518000, China

<sup>‡</sup> These authors contributed equally to this work.

\* Corresponding Email: [shguo@nju.edu.cn](mailto:shguo@nju.edu.cn)

## Methods

### Machine learning

This study utilized the Python programming language and the scikit-learn machine learning library to conduct classification training on 5 ML models. The performance of these models was rigorously evaluated using a variety of metrics, including accuracy, recall, and precision. Additionally, the models' discriminatory power was assessed through the analysis of the receiver operating characteristic (ROC) curve and the corresponding confusion matrix, which allowed for a comprehensive evaluation of their classification performance. To frame the problem for classification, the synthesis outcomes of medium- and high-entropy solid-state electrolytes were reformulated into a binary classification task. This involved compiling the synthesis data for 58 solid-state electrolytes and categorizing each result as either a successful synthesis (denoted by '1') or a failed synthesis (denoted by '0'). This binary dataset was then utilized to train the machine learning models, enabling them to learn the underlying patterns and relationships that distinguish between successful and unsuccessful synthesis outcomes.

### Materials Synthesis

All the compounds studied in this work were synthesized by solid-state reaction. Metal oxides (CaO, ZnO, MgO, Ga<sub>2</sub>O<sub>3</sub>, Y<sub>2</sub>O<sub>3</sub>, Bi<sub>2</sub>O<sub>3</sub>, Al<sub>2</sub>O<sub>3</sub>, Sc<sub>2</sub>O<sub>3</sub>, In<sub>2</sub>O<sub>3</sub>, Nd<sub>2</sub>O<sub>3</sub>, Er<sub>2</sub>O<sub>3</sub>, Tm<sub>2</sub>O<sub>3</sub>, Lu<sub>2</sub>O<sub>3</sub>, ZrO<sub>2</sub>, SnO<sub>2</sub>, HfO<sub>2</sub>, GeO<sub>2</sub>, CeO<sub>2</sub>, IrO<sub>2</sub>, TiO<sub>2</sub>, Ta<sub>2</sub>O<sub>5</sub>, MoO<sub>3</sub>, WO<sub>3</sub>) were used to provide metal cations. The oxides (99.9%, Sigma Aldrich) were used as purchased, which were preheated at 900 °C to decompose any carbonate or hydroxide impurities. Na<sub>2</sub>CO<sub>3</sub> (99.9%, Sigma Aldrich) were used to introduce Na ions. NH<sub>4</sub>H<sub>2</sub>PO<sub>4</sub> (99.9%, Sigma Aldrich) and SiO<sub>2</sub> (99.9%, Sigma Aldrich) was used to introduce PO<sub>4</sub> and SiO<sub>4</sub>. 10 wt.% excess of Na<sub>2</sub>CO<sub>3</sub> and NH<sub>4</sub>H<sub>2</sub>PO<sub>4</sub> was used to compensate for Na and P loss during high-temperature annealing. In a typical synthesis, the required precursors were mixed with anhydrous ethanol in a planetary ball mill (Pulverisette 6, Fritsch) using yttria-stabilized zirconia (YSZ) milling jars and balls. The ball-to-powder weight ratio was maintained at 20:1. The mixture was milled at 500 rpm for 12 h. The slurry was dried at 80 °C and then preheated at 900 °C for 12 h. Then, the obtained solids were ground using a mortar and pestle, pelletized, and heated at 1100-1200 °C for 12 h, finished by a controlled cooling rate of 2°C min<sup>-1</sup> in the air and grinding to obtain powders for further

characterizations. For the different NASICON oxide SSEs, the as-prepared pellets were polished with 1000, 2000, and 5000 mesh sandpapers and stored in a glovebox for electrochemical tests.

### **Materials characterizations**

X-ray diffraction (XRD) data of the different NASICON oxide powders were measured by a Bruker D8 Advance diffractometer (Germany) under room temperature, and the testing was completed under the protection of an argon atmosphere. The Rietveld refinements were performed to obtain the detailed crystal structures by the GSAS program on the EXPGUI interface. Scanning electron microscope (SEM) images were performed with a Sigma 300 field emission SEM instrument. For the transmission electron microscopy (TEM) investigation, the samples were thoroughly ground into powders and diluted in ethanol by ultrasonic treatment for 5 min. The suspension liquid was dripped onto holey carbon-coated Cu grids. The high-angle annular dark-field scanning transmission electron microscopy (HAADF-STEM) and energy dispersive spectroscopy (EDS) experiments were performed using an FEI Talos F200X G2 microscope equipped with Bruker windowless EDX detector at an accelerating voltage of 200 KV.

### **Conductivity measurements**

To measure ionic conductivities, the as-synthesized powders were pressed into pellets (10 mm diameter) and sintered under air at 1100 °C, followed by fast air cooling. The sintered pellets were sputtered with a thin layer of Au on each side to form good contact between the Au metal and the NASICON oxide pellets. AC impedance measurements were performed at room temperature using a Biologic VSP-300 potentiostat. A frequency range of 1 MHz to 1 Hz and an excitation voltage of 10 mV were applied during the measurements. Ionic conductivity was calculated based on the following Equation:  $\sigma_i = L/(R_i S)$ , where  $\sigma_i$ ,  $L$ ,  $S$ , and  $R_i$  represent the ionic conductivity, thickness of electrolyte pellets, electrolyte pellet surface area, and resistance value. Activation energies were calculated from the slope of the resulting Arrhenius plot. Electronic conductivity was examined by DC polarization experiment with a DC voltage of 0.5 V.

### **Na||Na symmetric cell fabrication and measurement**

To ensure optimal interfacial contact between the sodium metal electrodes and the NASICON solid electrolyte, a Sn interlayer was deposited on both surfaces of the electrolyte pellet via magnetron sputtering. Subsequently, Na foils with a diameter of 9 mm were symmetrically attached to the Sn-coated surfaces. All cell assembly procedures were performed in an Ar-filled glovebox maintaining H<sub>2</sub>O and O<sub>2</sub> levels below 0.1 ppm. The electrochemical performance of the symmetric cells was evaluated using CR2032 coin-type configurations. Galvanostatic sodium stripping/plating tests were conducted at room temperature with a constant current density of 0.1 mA cm<sup>-2</sup>. The critical current density of the solid electrolyte was determined using Na|SSEs|Na symmetric cells through a stepwise current cycling protocol. Measurements were performed on an automated battery testing system (NEWARE Battery Test System [CT-4008T-5V10mA-164, Shenzhen, China]) with an initial current density of 0.1 mA cm<sup>-2</sup>, incrementally increased by 0.1 mA cm<sup>-2</sup> per step until cell failure occurred.

#### **Na||NVPF full cell fabrication and measurement**

The CR2032-type ASSSBs were assembled using a NVPF-plastic crystal electrolyte (PCE) composite cathode, a sodium metal foil anode, and a NASICON-type solid electrolyte. A Sn interlayer was deposited onto the surface of the electrolyte pellet using magnetron sputtering. All cell assembly procedures were carried out in an argon-filled glovebox with H<sub>2</sub>O and O<sub>2</sub> levels below 0.1 ppm. The PCE was prepared as a deformable ionic conductor by dissolving 0.1 mmol NaClO<sub>4</sub> in 2 mmol succinonitrile at 65 °C, forming a homogeneous viscous yellow electrolyte upon cooling.<sup>[1,2]</sup> This design allows it to serve as a dynamic interfacial buffer in the cathode composite. The NVPF-PCE composite cathode was fabricated by mixing NVPF nanoplates, carbon black, PVDF binder, and PCE (60:5:10:25 wt%) in N-methyl-2-pyrrolidone (NMP), followed by slurry casting onto aluminum foil, vacuum drying, and punching into 9-mm discs (1.5 mg cm<sup>-2</sup> active mass loading). Galvanostatic charging/discharging (NEWARE Battery Test System [CT-4008T-5V10mA-164, Shenzhen, China]) of the cells was conducted in the voltage range of 2.0-4.3 V (vs Na/Na<sup>+</sup>) at room temperature.

#### **DFT and BVSE calculations**

The all DFT calculations were carried out using the Vienna Ab initio Simulation Package (VASP). We used the generalized gradient approximation of Perdew-Burke-Ernzerhof (GGA-

PBE) exchange-correlational functional and the projector-augmented wave method at the generalized gradient approximation level. A cutoff energy of 550 eV was set for all calculations. The total energy convergence and the forces on each atom were set to be  $10^{-5}$  eV and 0.03 eV  $\text{\AA}^{-1}$ . BVSE calculations were performed by means of the softBV-GUI program. To calculate the energy of ion sites in the structure, a three-dimensional grid with a resolution of 0.1  $\text{\AA}$  and a screening factor of 0.75 was used. The crystal structure and potential isosurfaces of the calculations were visualized using VESTA.

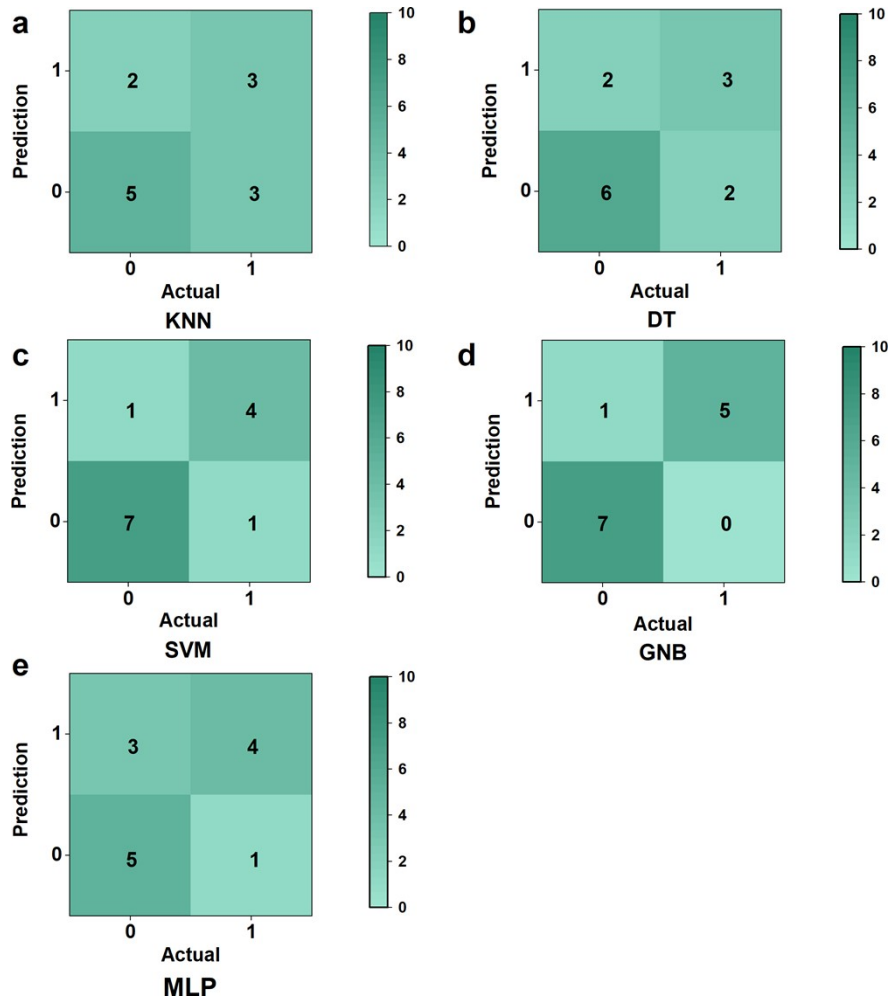

**Fig. S1** The confusion matrices of the five ML models for binary classification: (a) k-nearest neighbors (KNN); (b) decision tree (DT); (c) support vector machine (SVM); (d) Gaussian naive Bayes (GNB); (e) multilayer perceptron (MLP)

Based on the confusion matrices in Fig. S1 above, TPR (True Positive Rate) and FPR (False Positive Rate) are calculated and used to assess the predictive accuracy of machine learning in a more detailed manner. Specifically, TPR calculates the proportion of cases where Actual = 1 and Prediction = 1 among all cases where Actual = 1. While FPR calculates the proportion of cases where Actual = 0 but Prediction = 1 among all cases where Actual = 0.

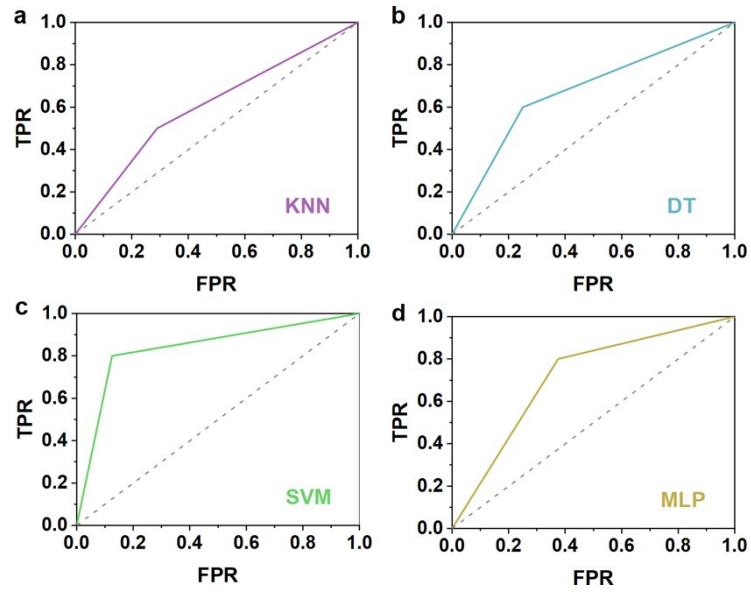

**Fig. S2** The ROC curves of the other four ML models. a) k-nearest neighbors (KNN), b) decision tree (DT), c) support vector machine (SVM), d) multilayer perceptron (MLP).

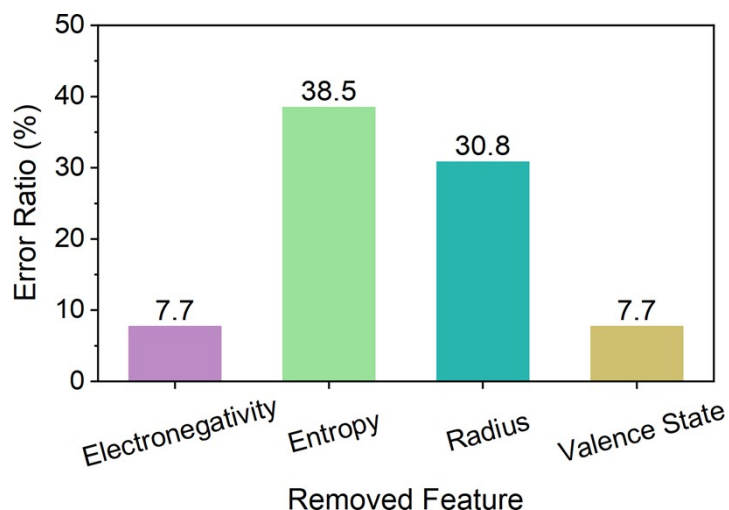

**Fig. S3** Results of feature importance analysis: increase in error ratio after removing individual features.

As shown in Fig. S3, the feature importance was evaluated by measuring the increase in model error when each individual descriptor was removed from the training process. A larger increase in error indicates a stronger contribution of that feature to the predictive performance of the model. According to the results, configurational entropy ranks as the most important descriptor. Its removal leads to the largest increase in prediction error, indicating that configurational entropy plays a dominant role in the model. This likely reflects its key influence on structural disorder, phase stability, or property variation in the studied material system. Ionic radius is the second most influential feature. Removing it results in a significant rise in error, though less than that of configurational entropy. This suggests that ionic size substantially affects structural arrangement, lattice strain, or ion-diffusion behavior captured by the model. Valence state and electronegativity show comparable and relatively lower importance, ranking third. Their removal causes a moderate but noticeable increase in error, indicating that both features contribute meaningfully to predictions. Specifically, valence state relates to charge balance and bonding capacity, while electronegativity influences bond polarity and chemical interactions. Nevertheless, their individual effects are less decisive than those of configurational entropy and ionic radius within this specific modeling context.



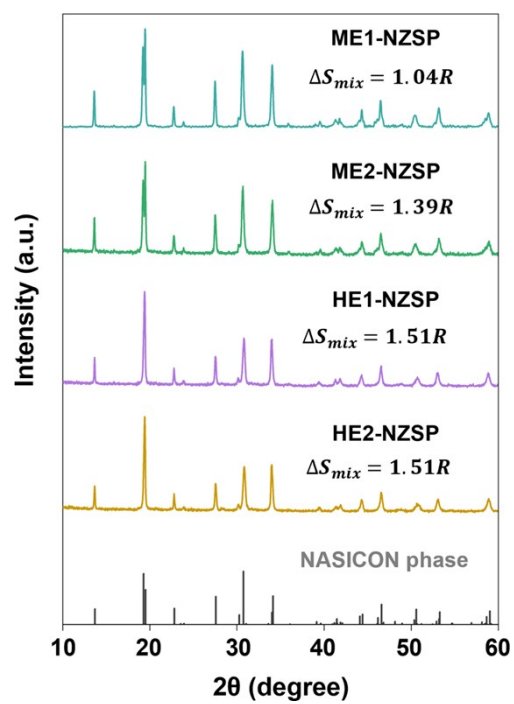

**Fig. S4** XRD patterns of four ML-selected medium- to high-entropy NASICON-type oxide SSEs (ME1-NZSP, ME2-NZSP, HE1-NZSP, and HE2-NZSP).

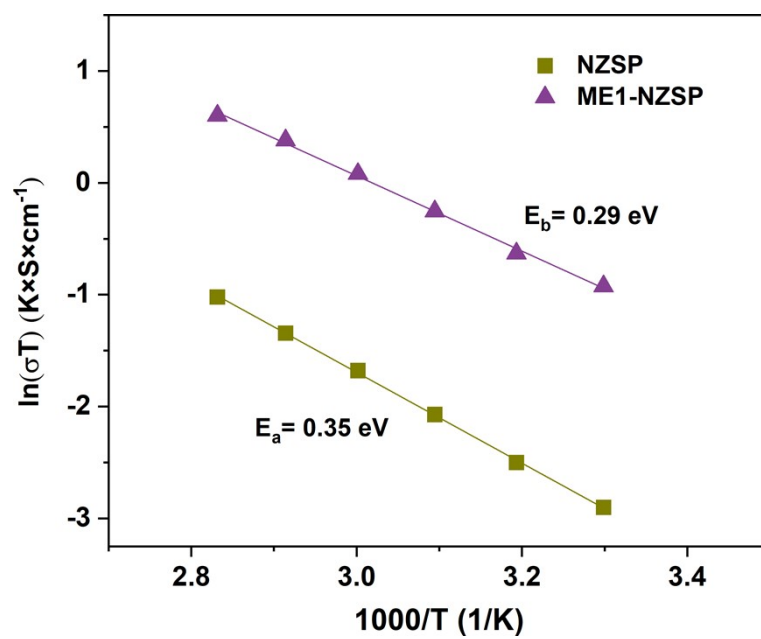

Fig. S5 Arrhenius plots of NZSP and ME1-NZSP SSEs.

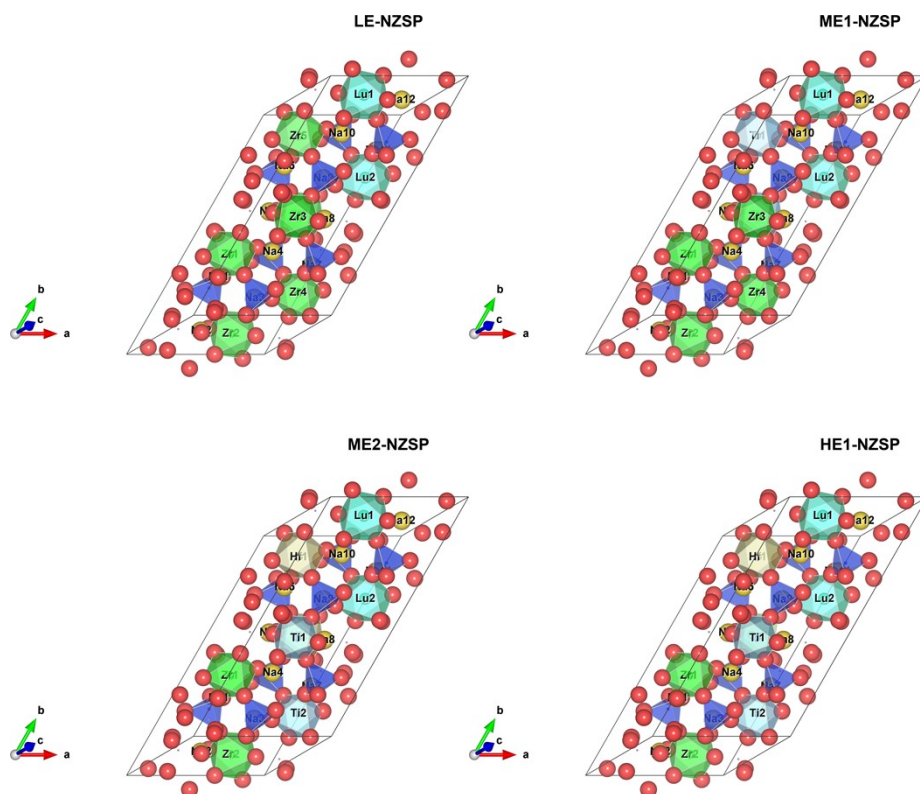

**Fig. S6** Structural optimization models of four representative compositions (LE-NZSP, ME1-NZSP, ME2-NZSP, and HE1-NZSP) obtained from DFT calculations.

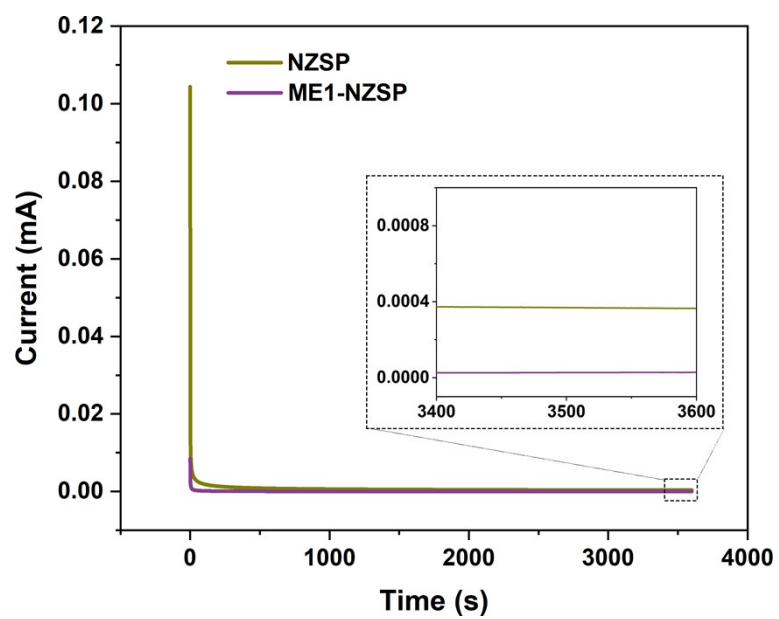

**Fig. S7** DC polarization curves of NZSP and ME1-NZSP SSEs.

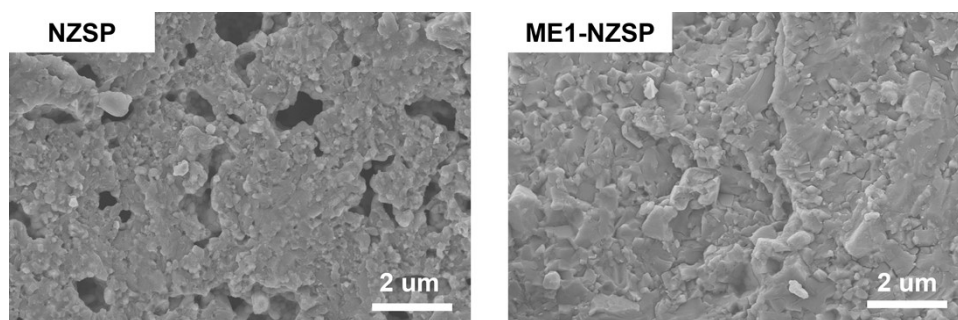

**Fig. S8** Cross-sectional SEM images of NZSP and ME1-NZSP SSEs. The NZSP electrolyte exhibits numerous voids in its cross-section, which would facilitate rapid sodium dendrite propagation during cycling. In contrast, ME1-NZSP demonstrates a homogeneous, densely-packed microstructure enabled by entropy-driven stabilization, effectively suppressing sodium dendrite formation.

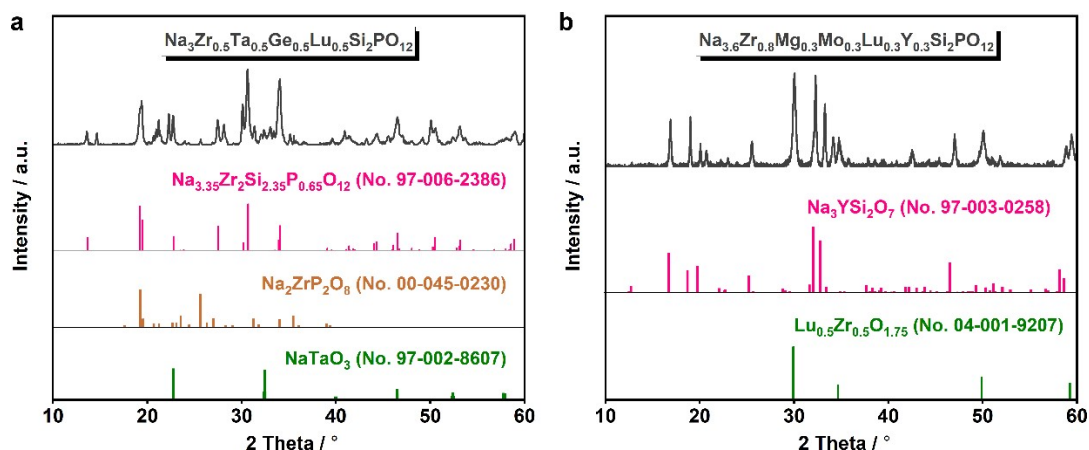

**Fig. S9.** XRD patterns for two of the compositions that were predicted to be non-synthesizable: (a)  $\text{Na}_3\text{Zr}_{0.5}\text{Ta}_{0.5}\text{Ge}_{0.5}\text{Lu}_{0.5}\text{Si}_2\text{PO}_{12}$  and (b)  $\text{Na}_{3.6}\text{Zr}_{0.8}\text{Mg}_{0.3}\text{Mo}_{0.3}\text{Lu}_{0.3}\text{Y}_{0.3}\text{Si}_2\text{PO}_{12}$ .

**Fig. S9a** shows the XRD pattern for  $\text{Na}_3\text{Zr}_{0.5}\text{Ta}_{0.5}\text{Ge}_{0.5}\text{Lu}_{0.5}\text{Si}_2\text{PO}_{12}$ , which was predicted to be non-synthesizable. The pattern reveals that the sample is composed primarily of three phases:  $\text{Na}_{3.35}\text{Zr}_2\text{Si}_{2.35}\text{P}_{0.65}\text{O}_{12}$  (No. 97-006-2386),  $\text{Na}_2\text{ZrP}_2\text{O}_8$  (No. 00-045-0230), and  $\text{NaTaO}_3$  (No. 97-002-8607). **Fig. S9b** shows the XRD pattern for  $\text{Na}_{3.6}\text{Zr}_{0.8}\text{Mg}_{0.3}\text{Mo}_{0.3}\text{Lu}_{0.3}\text{Y}_{0.3}\text{Si}_2\text{PO}_{12}$ , which was also predicted to be non-synthesizable. The pattern indicates the formation of two main phases:  $\text{Na}_3\text{YSi}_2\text{O}_7$  (No. 97-003-0258) and  $\text{Lu}_{0.5}\text{Zr}_{0.5}\text{O}_{1.75}$  (No. 04-001-9207). These XRD patterns illustrate the multi-phase nature of the samples that failed to form the intended single-phase NASICON structure, thereby providing insight into the structural outcomes of the unsynthesized compositions.

## Supplementary Tables

**Table S1.** Phase formation results of different component NASICON oxides.

| Number | Composition                                                                                                                          | Entropy value ( $\Delta S_{\text{mix}}$ ) | Result            |
|--------|--------------------------------------------------------------------------------------------------------------------------------------|-------------------------------------------|-------------------|
| 1      | $\text{Na}_{3.2}\text{Zr}_{1.9}\text{Ca}_{0.1}\text{Si}_2\text{PO}_{12}$ <sup>[3]</sup>                                              | 0.20R                                     | synthesizable     |
| 2      | $\text{Na}_{3.1}\text{Zr}_{1.9}\text{Nd}_{0.1}\text{Si}_2\text{PO}_{12}$ <sup>[4]</sup>                                              | 0.20R                                     | synthesizable     |
| 3      | $\text{Na}_{3.1}\text{Zr}_{1.9}\text{Gd}_{0.1}\text{Si}_2\text{PO}_{12}$ <sup>[5]</sup>                                              | 0.20R                                     | synthesizable     |
| 4      | $\text{Na}_{3.1}\text{Zr}_{1.9}\text{Yb}_{0.1}\text{Si}_2\text{PO}_{12}$ <sup>[5]</sup>                                              | 0.20R                                     | synthesizable     |
| 5      | $\text{Na}_3\text{Zr}_{1.9}\text{Ti}_{0.1}\text{Si}_2\text{PO}_{12}$ <sup>[6]</sup>                                                  | 0.20R                                     | synthesizable     |
| 6      | $\text{Na}_{3.4}\text{Mg}_{0.2}\text{Zr}_{1.8}\text{Si}_2\text{PO}_{12}$ <sup>[7]</sup>                                              | 0.33R                                     | synthesizable     |
| 7      | $\text{Na}_{3.4}\text{Zr}_{1.8}\text{Zn}_{0.2}\text{Si}_2\text{PO}_{12}$ <sup>[8]</sup>                                              | 0.33R                                     | synthesizable     |
| 8      | $\text{Na}_{3.2}\text{Zr}_{1.8}\text{Al}_{0.2}\text{Si}_2\text{PO}_{12}$ <sup>[9]</sup>                                              | 0.33R                                     | synthesizable     |
| 9      | $\text{Na}_{3.2}\text{Zr}_{1.8}\text{Y}_{0.2}\text{Si}_2\text{PO}_{12}$ <sup>[10]</sup>                                              | 0.33R                                     | synthesizable     |
| 10     | $\text{Na}_{3.3}\text{Zr}_{1.7}\text{La}_{0.3}\text{Si}_2\text{PO}_{12}$ <sup>[11]</sup>                                             | 0.42R                                     | synthesizable     |
| 11     | $\text{Na}_{3.4}\text{Zr}_{1.6}\text{Sc}_{0.4}\text{Si}_2\text{PO}_{12}$ <sup>[12]</sup>                                             | 0.50R                                     | synthesizable     |
| 12     | $\text{Na}_{3.33}\text{Zr}_{1.67}\text{Sc}_{0.29}\text{Yb}_{0.04}\text{Si}_2\text{PO}_{12}$ <sup>[13]</sup>                          | 0.51R                                     | synthesizable     |
| 13     | $\text{Na}_{3.5}\text{Zr}_{1.5}\text{Lu}_{0.5}\text{Si}_2\text{PO}_{12}$                                                             | 0.56R                                     | synthesizable     |
| 14     | $\text{Na}_3\text{ZrSnSi}_2\text{PO}_{12}$ <sup>[14]</sup>                                                                           | 0.69R                                     | synthesizable     |
| 15     | $\text{Na}_{3.3}\text{Zr}_{1.6}\text{Ta}_{0.1}\text{Zn}_{0.1}\text{TM}_{0.1}\text{Lu}_{0.1}\text{Si}_2\text{PO}_{12}$                | 0.78R                                     | non-synthesizable |
| 16     | $\text{Na}_{3.2}\text{Zr}_{1.6}\text{Ta}_{0.1}\text{Y}_{0.1}\text{TM}_{0.1}\text{Lu}_{0.1}\text{Si}_2\text{PO}_{12}$                 | 0.78R                                     | non-synthesizable |
| 17     | $\text{Na}_{3.1}\text{Zr}_{1.6}\text{Ta}_{0.1}\text{Ge}_{0.1}\text{TM}_{0.1}\text{Lu}_{0.1}\text{Si}_2\text{PO}_{12}$                | 0.78R                                     | non-synthesizable |
| 18     | $\text{Na}_{3.1}\text{Zr}_{1.6}\text{Ta}_{0.1}\text{Hf}_{0.1}\text{TM}_{0.1}\text{Lu}_{0.1}\text{Si}_2\text{PO}_{12}$                | 0.78R                                     | non-synthesizable |
| 19     | $\text{Na}_{3.3}\text{Zr}_{1.5}\text{Y}_{0.1}\text{Hf}_{0.1}\text{Ge}_{0.1}\text{TM}_{0.1}\text{Lu}_{0.1}\text{Si}_2\text{PO}_{12}$  | 0.97R                                     | synthesizable     |
| 20     | $\text{Na}_{3.4}\text{Zr}_{1.5}\text{Zn}_{0.1}\text{Hf}_{0.1}\text{Ge}_{0.1}\text{TM}_{0.1}\text{Lu}_{0.1}\text{Si}_2\text{PO}_{12}$ | 0.97R                                     | synthesizable     |
| 21     | $\text{Na}_{3.5}\text{Zr}_{1.5}\text{Zn}_{0.1}\text{Y}_{0.1}\text{Ge}_{0.1}\text{TM}_{0.1}\text{Lu}_{0.1}\text{Si}_2\text{PO}_{12}$  | 0.97R                                     | synthesizable     |
| 22     | $\text{Na}_{3.5}\text{Zr}_{1.5}\text{Mg}_{0.1}\text{Sn}_{0.1}\text{Y}_{0.1}\text{TM}_{0.1}\text{Lu}_{0.1}\text{Si}_2\text{PO}_{12}$  | 0.97R                                     | synthesizable     |
| 23     | $\text{Na}_{3.4}\text{Zr}_{1.5}\text{Sc}_{0.1}\text{Hf}_{0.1}\text{Al}_{0.1}\text{Mg}_{0.1}\text{Ce}_{0.1}\text{Si}_2\text{PO}_{12}$ | 0.97R                                     | non-synthesizable |
| 24     | $\text{Na}_{3.3}\text{Zr}_{1.5}\text{Sc}_{0.1}\text{Ta}_{0.1}\text{Al}_{0.1}\text{Mg}_{0.1}\text{Ce}_{0.1}\text{Si}_2\text{PO}_{12}$ | 0.97R                                     | non-synthesizable |
| 25     | $\text{Na}_{3.4}\text{Zr}_{1.5}\text{Zn}_{0.1}\text{Ta}_{0.1}\text{Y}_{0.1}\text{TM}_{0.1}\text{Lu}_{0.1}\text{Si}_2\text{PO}_{12}$  | 0.97R                                     | non-synthesizable |
| 26     | $\text{Na}_{3.3}\text{Zr}_{1.5}\text{Zn}_{0.1}\text{W}_{0.1}\text{Y}_{0.1}\text{TM}_{0.1}\text{Lu}_{0.1}\text{Si}_2\text{PO}_{12}$   | 0.97R                                     | non-synthesizable |
| 27     | $\text{Na}_{3.5}\text{Zr}_{1.5}\text{Mg}_{0.1}\text{Sn}_{0.1}\text{Nd}_{0.1}\text{TM}_{0.1}\text{Lu}_{0.1}\text{Si}_2\text{PO}_{12}$ | 0.97R                                     | non-synthesizable |
| 28     | $\text{Na}_{3.5}\text{Zr}_{1.5}\text{Mg}_{0.1}\text{Sn}_{0.1}\text{Ga}_{0.1}\text{TM}_{0.1}\text{Lu}_{0.1}\text{Si}_2\text{PO}_{12}$ | 0.97R                                     | synthesizable     |
| 29     | $\text{Na}_{3.5}\text{Zr}_{1.5}\text{Sc}_{0.1}\text{Ga}_{0.1}\text{Y}_{0.1}\text{TM}_{0.1}\text{Lu}_{0.1}\text{Si}_2\text{PO}_{12}$  | 0.97R                                     | synthesizable     |

| Number | Composition                                                                                                                                        | Entropy value<br>( $\Delta S_{\text{mix}}$ ) | Result            |
|--------|----------------------------------------------------------------------------------------------------------------------------------------------------|----------------------------------------------|-------------------|
| 30     | $\text{Na}_{3.5}\text{Zr}_{1.5}\text{Ca}_{0.1}\text{Sn}_{0.1}\text{Y}_{0.1}\text{Ti}_{0.1}\text{Lu}_{0.1}\text{Si}_2\text{PO}_{12}$                | 0.97R                                        | synthesizable     |
| 31     | $\text{Na}_{3.5}\text{Zr}_{1.5}\text{Mg}_{0.1}\text{Sn}_{0.1}\text{Zn}_{0.1}\text{Hf}_{0.1}\text{Lu}_{0.1}\text{Si}_2\text{PO}_{12}$               | 0.97R                                        | synthesizable     |
| 32     | $\text{Na}_{3.5}\text{Zr}_{1.4}\text{Zn}_{0.1}\text{Y}_{0.1}\text{Hf}_{0.1}\text{Ge}_{0.1}\text{Ti}_{0.1}\text{Lu}_{0.1}\text{Si}_2\text{PO}_{12}$ | 1.15R                                        | synthesizable     |
| 33     | $\text{Na}_{3.5}\text{Sc}_{0.5}\text{Ti}_{0.5}\text{Zr}_{0.5}\text{Hf}_{0.5}\text{Si}_2\text{PO}_{12}$ <sup>[15]</sup>                             | 1.39R                                        | synthesizable     |
| 34     | $\text{Na}_3\text{Zr}_{0.5}\text{Ti}_{0.5}\text{Hf}_{0.5}\text{Ce}_{0.5}\text{Si}_2\text{PO}_{12}$                                                 | 1.39R                                        | non-synthesizable |
| 35     | $\text{Na}_3\text{Zr}_{0.5}\text{Ti}_{0.5}\text{Hf}_{0.5}\text{Ge}_{0.5}\text{Si}_2\text{PO}_{12}$                                                 | 1.39R                                        | non-synthesizable |
| 36     | $\text{Na}_4\text{Zr}_{0.5}\text{Ti}_{0.5}\text{Hf}_{0.5}\text{Mg}_{0.5}\text{Si}_2\text{PO}_{12}$                                                 | 1.39R                                        | non-synthesizable |
| 37     | $\text{Na}_{3.4}\text{Sc}_{0.2}\text{In}_{0.2}\text{Ti}_{0.2}\text{Zr}_{0.7}\text{Hf}_{0.7}\text{Si}_2\text{PO}_{12}$ <sup>[15]</sup>              | 1.43R                                        | synthesizable     |
| 38     | $\text{Na}_{3.5}\text{Mg}_{0.1}\text{Sc}_{0.15}\text{In}_{0.15}\text{Ti}_{0.3}\text{Hf}_{0.3}\text{ZrSi}_2\text{PO}_{12}$ <sup>[15]</sup>          | 1.45R                                        | synthesizable     |
| 39     | $\text{Na}_{3.3}\text{Zr}_{0.8}\text{Ti}_{0.3}\text{Sn}_{0.3}\text{Ir}_{0.3}\text{Bi}_{0.3}\text{Si}_2\text{PO}_{12}$                              | 1.51R                                        | non-synthesizable |
| 40     | $\text{Na}_3\text{Zr}_{0.8}\text{Ti}_{0.3}\text{Sn}_{0.3}\text{Hf}_{0.3}\text{Ce}_{0.3}\text{Si}_2\text{PO}_{12}$                                  | 1.51R                                        | non-synthesizable |
| 41     | $\text{Na}_{3.3}\text{Zr}_{0.8}\text{Ti}_{0.3}\text{Sn}_{0.3}\text{Hf}_{0.3}\text{Lu}_{0.3}\text{Si}_2\text{PO}_{12}$                              | 1.51R                                        | non-synthesizable |
| 42     | $\text{Na}_{3.6}\text{Zr}_{0.8}\text{Ti}_{0.3}\text{Sn}_{0.3}\text{Hf}_{0.3}\text{Zn}_{0.3}\text{Si}_2\text{PO}_{12}$                              | 1.51R                                        | non-synthesizable |
| 43     | $\text{Na}_{3.3}\text{Zr}_{0.5}\text{Ti}_{0.5}\text{Hf}_{0.4}\text{Lu}_{0.5}\text{W}_{0.1}\text{Si}_2\text{PO}_{12}$                               | 1.51R                                        | non-synthesizable |
| 44     | $\text{Na}_{3.3}\text{Zr}_{0.5}\text{Ti}_{0.5}\text{Hf}_{0.4}\text{Lu}_{0.5}\text{Mo}_{0.1}\text{Si}_2\text{PO}_{12}$                              | 1.51R                                        | non-synthesizable |
| 45     | $\text{Na}_{3.4}\text{Zr}_{0.4}\text{Ti}_{0.4}\text{Sn}_{0.4}\text{Ir}_{0.4}\text{Bi}_{0.4}\text{Si}_2\text{PO}_{12}$                              | 1.61R                                        | non-synthesizable |
| 46     | $\text{Na}_3\text{Zr}_{0.4}\text{Ti}_{0.4}\text{Sn}_{0.4}\text{Hf}_{0.4}\text{Ce}_{0.4}\text{Si}_2\text{PO}_{12}$                                  | 1.61R                                        | non-synthesizable |
| 47     | $\text{Na}_{3.4}\text{Zr}_{0.4}\text{Ti}_{0.4}\text{Sn}_{0.4}\text{Hf}_{0.4}\text{Lu}_{0.4}\text{Si}_2\text{PO}_{12}$                              | 1.61R                                        | non-synthesizable |
| 48     | $\text{Na}_{3.8}\text{Zr}_{0.4}\text{Ti}_{0.4}\text{Sn}_{0.4}\text{Hf}_{0.4}\text{Zn}_{0.4}\text{Si}_2\text{PO}_{12}$                              | 1.61R                                        | non-synthesizable |
| 49     | $\text{Na}_{3.4}\text{Zr}_{0.4}\text{Zn}_{0.4}\text{Sn}_{0.4}\text{Hf}_{0.4}\text{Ta}_{0.4}\text{Si}_2\text{PO}_{12}$                              | 1.61R                                        | non-synthesizable |
| 50     | $\text{Na}_{4.6}\text{Zr}_{0.4}\text{Zn}_{0.4}\text{Sn}_{0.4}\text{Hf}_{0.4}\text{Mg}_{0.4}\text{Si}_2\text{PO}_{12}$                              | 1.61R                                        | non-synthesizable |
| 51     | $\text{Na}_{4.6}\text{Zr}_{0.4}\text{Ti}_{0.4}\text{Sn}_{0.4}\text{Mg}_{0.4}\text{Lu}_{0.4}\text{Si}_2\text{PO}_{12}$                              | 1.61R                                        | non-synthesizable |
| 52     | $\text{Na}_{4.2}\text{Zr}_{0.4}\text{Ti}_{0.4}\text{Sn}_{0.4}\text{Y}_{0.4}\text{Lu}_{0.4}\text{Si}_2\text{PO}_{12}$                               | 1.61R                                        | non-synthesizable |
| 53     | $\text{Na}_{4.6}\text{Zr}_{0.4}\text{Y}_{0.4}\text{Ti}_{0.4}\text{Yb}_{0.4}\text{Lu}_{0.4}\text{Si}_2\text{PO}_{12}$                               | 1.61R                                        | non-synthesizable |
| 54     | $\text{Na}_{4.2}\text{Zr}_{0.4}\text{Zn}_{0.4}\text{Sn}_{0.4}\text{Hf}_{0.4}\text{Lu}_{0.4}\text{Si}_2\text{PO}_{12}$                              | 1.61R                                        | non-synthesizable |
| 55     | $\text{Na}_{3.0}\text{Zr}_{0.4}\text{Bi}_{0.4}\text{Sn}_{0.4}\text{Hf}_{0.4}\text{Ta}_{0.4}\text{Si}_2\text{PO}_{12}$                              | 1.61R                                        | non-synthesizable |
| 56     | $\text{Na}_{4.6}\text{Zr}_{0.4}\text{Ti}_{0.4}\text{Sn}_{0.4}\text{Zn}_{0.4}\text{Lu}_{0.4}\text{Si}_2\text{PO}_{12}$                              | 1.61R                                        | non-synthesizable |
| 57     | $\text{Na}_{3.4}\text{Zr}_{0.4}\text{Ti}_{0.4}\text{Sn}_{0.4}\text{Nb}_{0.4}\text{Lu}_{0.4}\text{Si}_2\text{PO}_{12}$                              | 1.61R                                        | non-synthesizable |
| 58     | $\text{Na}_{4.6}\text{Zr}_{0.4}\text{Er}_{0.4}\text{Ti}_{0.4}\text{Yb}_{0.4}\text{Lu}_{0.4}\text{Si}_2\text{PO}_{12}$                              | 1.61R                                        | non-synthesizable |



**Table S2.** The four eigenvalues of machine learning.

| Number | Ionic radius (ppm) | Electronegativity | Valence state (+) | Entropy ( $\times R$ ) |
|--------|--------------------|-------------------|-------------------|------------------------|
| 1      | 84.80              | 1.314             | 3.90              | 0.199                  |
| 2      | 84.72              | 1.321             | 3.95              | 0.199                  |
| 3      | 84.49              | 1.324             | 3.95              | 0.199                  |
| 4      | 84.14              | 1.325             | 3.95              | 0.199                  |
| 5      | 82.83              | 1.341             | 4.00              | 0.199                  |
| 6      | 82.80              | 1.328             | 3.80              | 0.325                  |
| 7      | 81.60              | 1.362             | 3.80              | 0.325                  |
| 8      | 80.95              | 1.358             | 3.90              | 0.325                  |
| 9      | 84.60              | 1.319             | 3.90              | 0.325                  |
| 10     | 86.88              | 1.296             | 3.85              | 0.423                  |
| 11     | 82.10              | 1.336             | 3.80              | 0.500                  |
| 12     | 82.68              | 1.332             | 3.84              | 0.509                  |
| 13     | 84.53              | 1.248             | 3.75              | 0.562                  |
| 14     | 76.50              | 1.645             | 4.00              | 0.693                  |
| 15     | 82.11              | 1.334             | 3.85              | 0.778                  |
| 16     | 83.61              | 1.313             | 3.90              | 0.778                  |
| 17     | 81.76              | 1.352             | 3.95              | 0.778                  |
| 18     | 83.26              | 1.317             | 3.95              | 0.778                  |
| 19     | 83.01              | 1.337             | 3.85              | 0.965                  |
| 20     | 81.51              | 1.358             | 3.80              | 0.965                  |
| 21     | 81.86              | 1.354             | 3.75              | 0.965                  |
| 22     | 83.26              | 1.335             | 3.75              | 0.965                  |
| 23     | 82.00              | 1.333             | 3.80              | 0.965                  |
| 24     | 81.05              | 1.343             | 3.85              | 0.960                  |
| 25     | 82.41              | 1.329             | 3.80              | 0.965                  |
| 26     | 82.21              | 1.339             | 3.85              | 0.965                  |
| 27     | 83.67              | 1.331             | 3.75              | 0.965                  |
| 28     | 81.86              | 1.364             | 3.75              | 0.965                  |
| 29     | 83.03              | 1.330             | 3.75              | 0.965                  |
| 30     | 84.66              | 1.319             | 3.75              | 0.965                  |
| 31     | 81.51              | 1.359             | 3.75              | 0.965                  |
| 32     | 81.81              | 1.353             | 3.75              | 1.148                  |
| 33     | 75.50              | 1.383             | 3.75              | 1.386                  |
| 34     | 81.13              | 1.323             | 4.00              | 1.386                  |

| Number | Ionic radius (ppm) | Electronegativity | Valence state (+) | Entropy ( $\times R$ ) |
|--------|--------------------|-------------------|-------------------|------------------------|
| 35     | 70.13              | 1.545             | 4.00              | 1.386                  |
| 36     | 74.88              | 1.370             | 3.50              | 1.386                  |
| 37     | 79.95              | 1.389             | 3.80              | 1.426                  |
| 38     | 78.71              | 1.392             | 3.75              | 1.454                  |
| 39     | 77.85              | 1.672             | 3.85              | 1.505                  |
| 40     | 80.03              | 1.420             | 4.00              | 1.505                  |
| 41     | 78.39              | 1.402             | 3.85              | 1.505                  |
| 42     | 74.48              | 1.500             | 3.70              | 1.505                  |
| 43     | 77.25              | 1.313             | 3.85              | 1.511                  |
| 44     | 77.20              | 1.336             | 3.85              | 1.511                  |
| 45     | 75.80              | 1.786             | 3.80              | 1.609                  |
| 46     | 78.70              | 1.450             | 4.00              | 1.609                  |
| 47     | 76.52              | 1.426             | 3.80              | 1.609                  |
| 48     | 71.30              | 1.556             | 3.60              | 1.609                  |
| 49     | 72.00              | 1.548             | 3.80              | 1.609                  |
| 50     | 73.60              | 1.510             | 3.20              | 1.609                  |
| 51     | 79.82              | 1.370             | 3.20              | 1.609                  |
| 52     | 83.42              | 1.352             | 3.40              | 1.609                  |
| 53     | 86.98              | 1.204             | 3.20              | 1.609                  |
| 54     | 76.42              | 1.448             | 3.40              | 1.609                  |
| 55     | 80.60              | 1.598             | 4.00              | 1.609                  |
| 56     | 77.42              | 1.438             | 3.20              | 1.609                  |
| 57     | 78.22              | 1.428             | 3.80              | 1.609                  |
| 58     | 86.78              | 1.208             | 3.20              | 1.609                  |

**Table S3.** List of the twelve medium- and high-entropy NASICON oxides predicted using a machine learning approach.

| Number | Composition                                                                                                           | Entropy value ( $\Delta S_{\text{mix}}$ ) | Predicted Results | Experimental Results |
|--------|-----------------------------------------------------------------------------------------------------------------------|-------------------------------------------|-------------------|----------------------|
| 1      | $\text{Na}_{3.5}\text{Zr}_{1.0}\text{Ti}_{0.5}\text{Lu}_{0.5}\text{Si}_2\text{PO}_{12}$                               | 1.04R                                     | synthesizable     | synthesizable        |
| 2      | $\text{Na}_3\text{Zr}_{1.0}\text{Mo}_{0.5}\text{Mg}_{0.5}\text{Si}_2\text{PO}_{12}$                                   | 1.04R                                     | non-synthesizable | non-synthesizable    |
| 3      | $\text{Na}_{3.5}\text{Zr}_{1.0}\text{Sn}_{0.5}\text{Lu}_{0.5}\text{Si}_2\text{PO}_{12}$                               | 1.04R                                     | synthesizable     | non-synthesizable    |
| 4      | $\text{Na}_{3.5}\text{Zr}_{1.0}\text{Nb}_{0.5}\text{Zn}_{0.5}\text{Si}_2\text{PO}_{12}$                               | 1.04R                                     | non-synthesizable | non-synthesizable    |
| 5      | $\text{Na}_3\text{Zr}_{1.0}\text{Sc}_{0.5}\text{Ta}_{0.5}\text{Si}_2\text{PO}_{12}$                                   | 1.04R                                     | non-synthesizable | non-synthesizable    |
| 6      | $\text{Na}_{3.5}\text{Zr}_{0.5}\text{Ti}_{0.5}\text{Hf}_{0.5}\text{Lu}_{0.5}\text{Si}_2\text{PO}_{12}$                | 1.39R                                     | synthesizable     | synthesizable        |
| 7      | $\text{Na}_3\text{Zr}_{0.5}\text{Ta}_{0.5}\text{Ge}_{0.5}\text{Lu}_{0.5}\text{Si}_2\text{PO}_{12}$                    | 1.39R                                     | non-synthesizable | non-synthesizable    |
| 8      | $\text{Na}_{3.5}\text{Zr}_{0.5}\text{Ta}_{0.5}\text{Al}_{0.5}\text{Lu}_{0.5}\text{Si}_2\text{PO}_{12}$                | 1.39R                                     | non-synthesizable | non-synthesizable    |
| 9      | $\text{Na}_{3.6}\text{Zr}_{0.8}\text{Mg}_{0.3}\text{Mo}_{0.3}\text{Lu}_{0.3}\text{Y}_{0.3}\text{Si}_2\text{PO}_{12}$  | 1.51R                                     | non-synthesizable | non-synthesizable    |
| 10     | $\text{Na}_{3.6}\text{Zr}_{0.8}\text{Yb}_{0.3}\text{Nb}_{0.3}\text{Lu}_{0.3}\text{Y}_{0.3}\text{Si}_2\text{PO}_{12}$  | 1.51R                                     | non-synthesizable | non-synthesizable    |
| 11     | $\text{Na}_{3.6}\text{Zr}_{0.5}\text{Ti}_{0.5}\text{Hf}_{0.4}\text{Lu}_{0.5}\text{Ga}_{0.1}\text{Si}_2\text{PO}_{12}$ | 1.51R                                     | synthesizable     | synthesizable        |
| 12     | $\text{Na}_{3.6}\text{Zr}_{0.5}\text{Ti}_{0.5}\text{Hf}_{0.4}\text{Lu}_{0.5}\text{Sc}_{0.1}\text{Si}_2\text{PO}_{12}$ | 1.51R                                     | synthesizable     | synthesizable        |

**Table S4.** Rietveld refinement structural parameters for the medium-entropy composition  $\text{Na}_{3.5}\text{Zr}_{1.0}\text{Ti}_{0.5}\text{Lu}_{0.5}\text{Si}_2\text{PO}_{12}$ .

| $\text{Na}_{3.49}\text{Zr}_{1.0}\text{Ti}_{0.5}\text{Lu}_{0.5}\text{Si}_2\text{PO}_{12}$ ( $C2/c$ ) |          |      |         |          |          |         |
|-----------------------------------------------------------------------------------------------------|----------|------|---------|----------|----------|---------|
| Atomic<br>Occupancies                                                                               | Wyckoff  | Atom | x       | y        | z        | Occ.    |
|                                                                                                     | 4e       | Na   | 0.50000 | 0.91401  | 0.25000  | 0.54371 |
|                                                                                                     | 4d       | Na   | 0.25000 | 0.25000  | 0.50000  | 0.43493 |
|                                                                                                     | 8f       | Na   | 0.84540 | -0.10553 | 0.61367  | 0.60878 |
|                                                                                                     | 4e       | P    | 0.00000 | 0.11548  | 0.25000  | 0.17000 |
|                                                                                                     | 4e       | Si   | 0.00000 | 0.11548  | 0.25000  | 0.33000 |
|                                                                                                     | 8f       | P    | 0.34082 | 0.12246  | 0.21362  | 0.33000 |
|                                                                                                     | 8f       | Si   | 0.34082 | 0.12246  | 0.21362  | 0.67000 |
|                                                                                                     | 8f       | Zr   | 0.09514 | 0.24140  | 0.05174  | 0.50000 |
|                                                                                                     | 8f       | Ti   | 0.09514 | 0.24140  | 0.05174  | 0.25000 |
|                                                                                                     | 8f       | Lu   | 0.09514 | 0.24140  | 0.05174  | 0.25000 |
|                                                                                                     | 8f       | O    | 0.08906 | 0.11101  | 0.28901  | 1.00000 |
|                                                                                                     | 8f       | O    | 0.49128 | 0.21453  | 0.43050  | 1.00000 |
|                                                                                                     | 8f       | O    | 0.10907 | 0.45827  | 0.22016  | 1.00000 |
|                                                                                                     | 8f       | O    | 0.30030 | 0.19213  | -0.00104 | 1.00000 |
|                                                                                                     | 8f       | O    | 0.43418 | 0.47603  | 0.09113  | 1.00000 |
|                                                                                                     | 8f       | O    | 0.27691 | 0.19555  | 0.25112  | 1.00000 |
| Lattice<br>Parameters                                                                               | a/Å      |      | b/Å     |          | c/Å      |         |
|                                                                                                     | 15.61382 |      | 9.04419 |          | 9.19836  |         |

**Table S5.** Rietveld refinement structural parameters for the medium-entropy composition  $\text{Na}_{3.5}\text{Zr}_{0.5}\text{Ti}_{0.5}\text{Hf}_{0.5}\text{Lu}_{0.5}\text{Si}_2\text{PO}_{12}$ .

| $\text{Na}_{3.48}\text{Zr}_{0.5}\text{Ti}_{0.5}\text{Hf}_{0.5}\text{Lu}_{0.5}\text{Si}_2\text{PO}_{12}$ ( $C2/c$ ) |          |      |         |         |         |         |
|--------------------------------------------------------------------------------------------------------------------|----------|------|---------|---------|---------|---------|
| Atomic Occupancies                                                                                                 | Wyckoff  | Atom | x       | y       | z       | Occ.    |
|                                                                                                                    | 4e       | Na   | 0.50000 | 0.94107 | 0.25000 | 0.45639 |
|                                                                                                                    | 4d       | Na   | 0.25000 | 0.25000 | 0.50000 | 0.41307 |
|                                                                                                                    | 8f       | Na   | 0.77681 | 0.07491 | 0.69792 | 0.63054 |
|                                                                                                                    | 4e       | P    | 0.00000 | 0.02263 | 0.25000 | 0.17000 |
|                                                                                                                    | 4e       | Si   | 0.00000 | 0.02263 | 0.25000 | 0.33000 |
|                                                                                                                    | 8f       | P    | 0.33956 | 0.12052 | 0.26148 | 0.33000 |
|                                                                                                                    | 8f       | Si   | 0.33956 | 0.12052 | 0.26148 | 0.67000 |
|                                                                                                                    | 8f       | Zr   | 0.09820 | 0.24446 | 0.05561 | 0.25000 |
|                                                                                                                    | 8f       | Ti   | 0.09820 | 0.24446 | 0.05561 | 0.25000 |
|                                                                                                                    | 8f       | Hf   | 0.09820 | 0.24446 | 0.05561 | 0.25000 |
|                                                                                                                    | 8f       | Lu   | 0.09820 | 0.24446 | 0.05561 | 0.25000 |
|                                                                                                                    | 8f       | O    | 0.08725 | 0.11518 | 0.24193 | 1.00000 |
|                                                                                                                    | 8f       | O    | 0.45991 | 0.17055 | 0.41622 | 1.00000 |
|                                                                                                                    | 8f       | O    | 0.18611 | 0.48210 | 0.25985 | 1.00000 |
|                                                                                                                    | 8f       | O    | 0.42150 | 0.05521 | 0.13639 | 1.00000 |
|                                                                                                                    | 8f       | O    | 0.41223 | 0.46852 | 0.02318 | 1.00000 |
|                                                                                                                    | 8f       | O    | 0.23481 | 0.14548 | 0.17267 | 1.00000 |
| Lattice Parameters                                                                                                 | a/Å      |      | b/Å     |         | c/Å     |         |
|                                                                                                                    | 15.60013 |      | 9.03673 |         | 9.19456 |         |

**Table S6.** Rietveld refinement structural parameters for the high-entropy composition  $\text{Na}_{3.6}\text{Zr}_{0.5}\text{Ti}_{0.5}\text{Hf}_{0.4}\text{Lu}_{0.5}\text{Ga}_{0.1}\text{Si}_2\text{PO}_{12}$ .

| $\text{Na}_{3.59}\text{Zr}_{0.5}\text{Ti}_{0.5}\text{Hf}_{0.4}\text{Lu}_{0.5}\text{Ga}_{0.1}\text{Si}_2\text{PO}_{12}$ (C2/c) |          |      |         |         |          |         |
|-------------------------------------------------------------------------------------------------------------------------------|----------|------|---------|---------|----------|---------|
| Atomic Occupancies                                                                                                            | Wyckoff  | Atom | x       | y       | z        | Occ.    |
|                                                                                                                               | 4e       | Na   | 0.50000 | 0.83682 | 0.25000  | 0.86129 |
|                                                                                                                               | 4d       | Na   | 0.25000 | 0.25000 | 0.50000  | 0.22167 |
|                                                                                                                               | 8f       | Na   | 0.86932 | 0.28761 | 0.83424  | 0.41704 |
|                                                                                                                               | 4e       | P    | 0.00000 | 0.09051 | 0.25000  | 0.17000 |
|                                                                                                                               | 4e       | Si   | 0.00000 | 0.09051 | 0.25000  | 0.33000 |
|                                                                                                                               | 8f       | P    | 0.34306 | 0.09958 | 0.20092  | 0.33000 |
|                                                                                                                               | 8f       | Si   | 0.34306 | 0.09958 | 0.20092  | 0.67000 |
|                                                                                                                               | 8f       | Zr   | 0.10557 | 0.25211 | 0.05306  | 0.12500 |
|                                                                                                                               | 8f       | Ti   | 0.10557 | 0.25211 | 0.05306  | 0.12500 |
|                                                                                                                               | 8f       | Hf   | 0.10557 | 0.25211 | 0.05306  | 0.10000 |
|                                                                                                                               | 8f       | Lu   | 0.10557 | 0.25211 | 0.05306  | 0.12500 |
|                                                                                                                               | 8f       | Ga   | 0.10557 | 0.25211 | 0.05306  | 0.02500 |
|                                                                                                                               | 8f       | O    | 0.08564 | 0.07055 | 0.25521  | 1.00000 |
|                                                                                                                               | 8f       | O    | 0.47742 | 0.18375 | 0.42427  | 1.00000 |
|                                                                                                                               | 8f       | O    | 0.20403 | 0.47440 | 0.20928  | 1.00000 |
|                                                                                                                               | 8f       | O    | 0.26216 | 0.18469 | -0.04374 | 1.00000 |
|                                                                                                                               | 8f       | O    | 0.44311 | 0.61171 | 0.20092  | 1.00000 |
|                                                                                                                               | 8f       | O    | 0.31675 | 0.18507 | 0.28294  | 1.00000 |
| Lattice Parameters                                                                                                            | a/Å      |      | b/Å     |         | c/Å      |         |
|                                                                                                                               | 15.60500 |      | 9.01500 |         | 9.18000  |         |

**Table S7.** Rietveld refinement structural parameters for the high-entropy composition  $\text{Na}_{3.6}\text{Zr}_{0.5}\text{Ti}_{0.5}\text{Hf}_{0.4}\text{Lu}_{0.5}\text{Sc}_{0.1}\text{Si}_2\text{PO}_{12}$ .

| $\text{Na}_{3.62}\text{Zr}_{0.5}\text{Ti}_{0.5}\text{Hf}_{0.4}\text{Lu}_{0.5}\text{Sc}_{0.1}\text{Si}_2\text{PO}_{12}$ (C2/c) |          |      |         |         |          |         |
|-------------------------------------------------------------------------------------------------------------------------------|----------|------|---------|---------|----------|---------|
| Atomic Occupancies                                                                                                            | Wyckoff  | Atom | x       | y       | z        | Occ.    |
|                                                                                                                               | 4e       | Na   | 0.50000 | 0.89396 | 0.25000  | 0.50388 |
|                                                                                                                               | 4d       | Na   | 0.25000 | 0.25000 | 0.50000  | 0.26094 |
|                                                                                                                               | 8f       | Na   | 0.79758 | 0.22482 | 0.80429  | 0.73518 |
|                                                                                                                               | 4e       | P    | 0.00000 | 0.02414 | 0.25000  | 0.17000 |
|                                                                                                                               | 4e       | Si   | 0.00000 | 0.02414 | 0.25000  | 0.33000 |
|                                                                                                                               | 8f       | P    | 0.36316 | 0.12585 | 0.25134  | 0.33000 |
|                                                                                                                               | 8f       | Si   | 0.36316 | 0.12585 | 0.25134  | 0.67000 |
|                                                                                                                               | 8f       | Zr   | 0.09598 | 0.25353 | 0.06155  | 0.12500 |
|                                                                                                                               | 8f       | Ti   | 0.09598 | 0.25353 | 0.06155  | 0.12500 |
|                                                                                                                               | 8f       | Hf   | 0.09598 | 0.25353 | 0.06155  | 0.10000 |
|                                                                                                                               | 8f       | Lu   | 0.09598 | 0.25353 | 0.06155  | 0.12500 |
|                                                                                                                               | 8f       | Sc   | 0.09598 | 0.25353 | 0.06155  | 0.02500 |
|                                                                                                                               | 8f       | O    | 0.08458 | 0.13769 | 0.30390  | 1.00000 |
|                                                                                                                               | 8f       | O    | 0.46507 | 0.21530 | 0.42909  | 1.00000 |
|                                                                                                                               | 8f       | O    | 0.12205 | 0.42329 | 0.18746  | 1.00000 |
|                                                                                                                               | 8f       | O    | 0.24810 | 0.10965 | -0.10503 | 1.00000 |
|                                                                                                                               | 8f       | O    | 0.42869 | 0.45543 | 0.03138  | 1.00000 |
|                                                                                                                               | 8f       | O    | 0.23718 | 0.15027 | 0.16179  | 1.00000 |
| Lattice Parameters                                                                                                            | a/Å      |      | b/Å     |         | c/Å      |         |
|                                                                                                                               | 15.62000 |      | 9.03000 |         | 9.19000  |         |

**Table S8.** The bulk ( $\sigma_b$ ), grain-boundary ( $\sigma_{gb}$ ) and total ( $\sigma_t$ ) ionic conductivities of  $\text{Na}_{3.5}\text{Zr}_{1.0}\text{Ti}_{0.5}\text{Lu}_{0.5}\text{Si}_2\text{PO}_{12}$  (ME1-NZSP) and  $\text{Na}_3\text{Zr}_2\text{Si}_2\text{PO}_{12}$  (NZSP) pellets.

|                                      | ME1-NZSP | NZSP |
|--------------------------------------|----------|------|
| $\sigma_b$ (mS cm <sup>-1</sup> )    | 2.95     | 2.98 |
| $\sigma_{gb}$ (mS cm <sup>-1</sup> ) | 2.16     | 0.29 |
| $\sigma_t$ (mS cm <sup>-1</sup> )    | 1.30     | 0.26 |

As shown in **Table S8**, both materials exhibit comparable bulk ionic conductivities ( $\sim 2.95$ - $2.98$  mS cm<sup>-1</sup>). The most notable improvement is observed in the grain-boundary conductivity.  $\sigma_{gb}$  for ME1-NZSP ( $2.16$  mS cm<sup>-1</sup>) is  $\sim 7.4$  times higher than that of the undoped NZSP ( $0.29$  mS cm<sup>-1</sup>). This dramatic increase is the primary reason for the superior total ionic conductivity of ME1-NZSP. Therefore, although the bulk conductivities are similar, the vastly improved grain-boundary conductivity directly results in ME1-NZSP achieving a total ionic conductivity ( $1.30$  mS cm<sup>-1</sup>) that is approximately 5 times higher than that of baseline NZSP ( $0.26$  mS cm<sup>-1</sup>).



**Table S9.** Shrinkage rates and relative densities of the pristine NZSP and ME1-NZSP pellets

| <b>Sample</b>        | <b>D<sub>(pre-sintered)</sub><br/>(mm)</b> | <b>D<sub>(sintered)</sub><br/>(mm)</b> | <b>Shrinkage<br/>rates (%)</b> | <b>ρ<sub>(measured)</sub><br/>(g/cm<sup>3</sup>)</b> | <b>ρ<sub>(theoretical)</sub><br/>(g/cm<sup>3</sup>)</b> | <b>Relative<br/>Density(%)</b> |
|----------------------|--------------------------------------------|----------------------------------------|--------------------------------|------------------------------------------------------|---------------------------------------------------------|--------------------------------|
| <b>NZSP</b>          | 10                                         | 9.91                                   | 0.9                            | 2.776                                                | 3.243                                                   | 85.6                           |
| <b>ME1-<br/>NZSP</b> | 10                                         | 8.56                                   | 14.4                           | 3.361                                                | 3.437                                                   | 97.8                           |

\*Note: The linear shrinkage rate was calculated as  $[(D_{(pre-sintered)} - D_{(sintered)}) / D_{(pre-sintered)}] \times 100\%$ . The relative density was determined using the Archimedes (water immersion) method, expressed as  $(\rho_{(measured)} / \rho_{(theoretical)}) \times 100\%$ .

The key parameters are summarized in **Table S9** above. The pristine NZSP pellet exhibited a low linear shrinkage of 0.9% and a correspondingly low relative density of 85.6%, indicating insufficient densification during sintering. In contrast, the ME1-NZSP pellet showed a significantly higher linear shrinkage of 14.4%, which contributed to its achieving a near-fully dense structure with a relative density of 97.8%.

**Table S10.** Comparative electrochemical performance of solid-state sodium metal batteries employing NZSP-type NASICON oxide SSEs from literature reports.

| Oxide SSEs                                                                                     | Cathode            | Rate, temperature                   | Cycle number | Initial capacity (mAh/g) | Last capacity (mAh/g) | Ref.      |
|------------------------------------------------------------------------------------------------|--------------------|-------------------------------------|--------------|--------------------------|-----------------------|-----------|
| $\text{Na}_{3.125}\text{Zr}_{1.75}\text{Sc}_{0.125}\text{Ge}_{0.125}\text{Si}_2\text{PO}_{12}$ | NVP                | 0.2C, R.T.                          | 250          | 101.0                    | 98.9                  | [16]      |
| $\text{Na}_3\text{Zr}_2\text{Si}_2\text{PO}_{12}$                                              | NVP                | 0.5C, 80°C                          | 100          | 92.3                     | 75.7                  | [17]      |
| $\text{Na}_3\text{Zr}_2\text{Si}_2\text{PO}_{12}$                                              | NVP                | 0.1C, 80°C                          | 120          | 103.9                    | 97.6                  | [18]      |
| Mg/F- $\text{Na}_3\text{Zr}_2\text{Si}_2\text{PO}_{12}$                                        | NVP                | 0.2C, R.T.                          | 50           | 95.0                     | 85.7                  | [19]      |
| $\text{Na}_3\text{Zr}_2\text{Si}_2\text{PO}_{12}$ -0.7F                                        | NVP                | 0.5C, 40°C                          | 100          | 87.8                     | 85.9                  | [20]      |
| $\text{Na}_3\text{Zr}_2\text{Si}_2\text{PO}_{12}$                                              | NVP                | 10 $\mu\text{A}/\text{cm}^2$ , 80°C | 50           | 80.0                     | 53.0                  | [21]      |
| $\text{Na}_{3.4}\text{Mg}_{0.1}\text{Zr}_{1.9}\text{Si}_{2.2}\text{P}_{0.8}\text{O}_{12}$      | NVP                | 0.1C, 60°C                          | 50           | 100.0                    | 93.3                  | [22]      |
| $\text{Na}_3\text{Zr}_2\text{Si}_2\text{PO}_{12}$ -3BTO                                        | NVCP               | 100 mA g <sup>-1</sup> , 25°C       | 400          | 95.0                     | 81.0                  | [23]      |
| 0.2Mg- $\text{Na}_3\text{Zr}_2\text{Si}_2\text{PO}_{12}$                                       | NaCrO <sub>2</sub> | 5.0C, 25°C                          | 470          | 102.6                    | 88.4                  | [24]      |
| $\text{Na}_3\text{Zr}_2\text{Si}_2\text{PO}_{12}$                                              | NVP                | 0.5C, R.T.                          | 100          | 96.7                     | 91.1                  | [25]      |
| $\text{Na}_3\text{Zr}_2\text{Si}_2\text{PO}_{12}$                                              | NVP                | 1.0C, 30°C                          | 400          | 64.6                     | 19.4                  | [26]      |
| $\text{Na}_{3.65}\text{Zr}_{1.675}\text{Zn}_{0.2}\text{Mg}_{0.125}\text{Si}_2\text{PO}_{12}$   | NVP                | 0.2C, R.T.                          | 300          | 116                      | 76.6                  | [27]      |
| $\text{Na}_{3.36}\text{Zr}_{1.64}\text{Sc}_{0.36}\text{Si}_2\text{PO}_{12}$                    | NVP                | 1.0C, 30°C                          | 350          | 108.8                    | 97.3                  | [28]      |
| $\alpha\text{-FeOF}@ \text{Na}_3\text{Zr}_2\text{Si}_2\text{PO}_{12}$                          | NVP                | 2.0C, 80°C                          | 500          | 89.6                     | 66.3                  | [29]      |
| $\text{Na}_3\text{Zr}_2\text{Si}_2\text{PO}_{12}$ -SPAN                                        | NVP                | 0.5C, R.T.                          | 200          | 104.8                    | 87.5                  | [30]      |
| $\text{Na}_3\text{Zr}_2\text{Si}_2\text{PO}_{12}$                                              | NVCP               | 100 mA g <sup>-1</sup> , 25°C       | 400          | 103                      | 75.2                  | [31]      |
| TiO <sub>2</sub> - $\text{Na}_3\text{Zr}_2\text{Si}_2\text{PO}_{12}$                           | NVP                | 0.1C, 60°C                          | 60           | 106.3                    | 75.0                  | [32]      |
| $\text{Na}_{3.4}\text{Zr}_{1.8}\text{Mn}_{0.2}\text{Si}_2\text{PO}_{12}$                       | NVP                | 0.1C, 25°C                          | 260          | 91.3                     | 84.2                  | [33]      |
| $\text{Na}_{3.2}\text{Zr}_{1.8}\text{Ce}_{0.2}\text{Si}_2\text{PO}_{12}$                       | NVP                | 0.5C, 25°C                          | 200          | 111.2                    | 109.0                 | [34]      |
| SnF <sub>2</sub> - $\text{Na}_3\text{Zr}_2\text{Si}_2\text{PO}_{12}$                           | NVP                | 1.0C, 25°C                          | 200          | 110.3                    | 72.2                  | [35]      |
| ME1-NZSP                                                                                       | NVPF               | 2.0C, R.T.                          | 700          | 113.3                    | 90.6                  | This work |

Note: NVP =  $\text{Na}_3\text{V}_2(\text{PO}_4)_3$ , R.T. = Room temperature, NVCP =  $\text{Na}_3\text{V}_{1.5}\text{Cr}_{0.5}(\text{PO}_4)_3$ , NVPF =  $\text{Na}_3\text{V}_2(\text{PO}_4)_2\text{F}_3$ , ME1-NZSP =  $\text{Na}_{3.5}\text{Zr}_{0.5}\text{Ti}_{0.5}\text{Hf}_{0.5}\text{Lu}_{0.5}\text{Si}_2\text{PO}_{12}$

## References

1. H. Gao, L. Xue, S. Xin, K. Park, J.B. Goodenough, *Angew. Chem. Int. Ed.*, 2017, **56**, 5541-5545.
2. D. Li, C. Sun, C. Wang, J. Li, Z. Wang, H. Jin, *Energy Storage Mater.*, 2023, **54**, 403-409.
3. Y. Lu, J.A. Alonso, Q. Yi, L. Lu, Z.L. Wang, C. Sun, *Adv. Energy Mater.*, 2019, **9**, 1901205.
4. Y. Ruan, S. Song, J. Liu, P. Liu, B. Cheng, X. Song, V. Battaglia, *Ceram. Int.*, 2017, **43**, 7810-7815.
5. Z. Khakpour, *Electrochim. Acta*, 2016, **196**, 337-347.
6. D. Chen, F. Luo, W. Zhou, D. Zhu, *J. Alloys Compd.*, 2018, **757**, 348-355.
7. C. Wang, Z. Sun, Y. Zhao, B. Wang, C. Shao, C. Sun, Y. Zhao, J. Li, H. Jin, L. Qu, *Small*, 2021, **17**, 2103819.
8. J. Yang, G. Liu, M. Avdeev, H. Wan, F. Han, L. Shen, Z. Zou, S. Shi, Y. Hu, C. Wang, X. Yao, *ACS Energy Lett.*, 2020, **5**, 2835-2841.
9. A.G. Jolley, G. Cohn, G.T. Hitz, E.D. Wachsman, *Ionics*, 2015, **21**, 3031-3038.
10. Q. Zhang, F. Liang, T. Qu, Y. Yao, W. Ma, B. Yang, Y. Dai, *IOP Conf. Ser. Mater. Sci. Eng.*, 2018, **423**, 012122.
11. Z. Zhang, Q. Zhang, J. Shi, Y.S. Chu, X. Yu, K. Xu, M. Ge, H. Yan, W. Li, L. Gu, Y. Hu, H. Li, X. Yang, L. Chen, X. Huang, *Adv. Energy Mater.*, 2016, **7**, 1601196.
12. Q. Ma, M. Guin, S. Naqash, C. Tsai, F. Tietz, O. Guillon, *Chem. Mater.*, 2016, **28**, 4821-4828.
13. S. K. Pal, R. Saha, G.V. Kumar, S. Omar, *J. Phys. Chem. C*, 2020, **124**, 9161-9169.
14. P. Yadav, M.C. Bhatnagar, *J. Electroceram.*, 2013, **30**, 145-151.
15. Y. Zeng, B. Ouyang, J. Liu, Y. W. Byeon, Z. Cai, L. Miara, Y. Wang, G. Ceder, *Science*, 2022, **378**, 1320-1324.
16. L. Ran, A. Baktash, M. Li, Y. Yin, B. Demir, T. Lin, M. Li, M. Rana, I. Gentle, L. Wang, D. Searles, R. Knibbe, *Energy Storage Mater.*, 2021, **40**, 282-291.
17. X. Wang, Z. Liu, Y. Tang, J. Chen, D. Wang, Z. Mao, *J. Power Sources*, 2021, **481**, 228924.
18. Z. Zhang, S. Wenzel, Y. Zhu, J. Sann, L. Shen, J. Yang, X. Yao, Y.-S. Hu, C. Wolverton, H. Li, L. Chen, J. Janek, *ACS Appl. Energy Mater.*, 2020, **3**, 7427-7437.
19. S. He, Y. Xu, X. Ma, Y. Chen, J. Lin, C. Wang, *ChemElectroChem*, 2020, **7**, 2087-2094.
20. S. He, Y. Xu, Y. Chen, X. Ma, *J. Mater. Chem. A*, 2020, **8**, 12594-12602.
21. Y. Noguchi, E. Kobayashi, L.S. Plashnitsa, S. Okada, J.-i. Yamaki, *Electrochim. Acta*, 2013, **101**, 59-65.
22. L. Shen, J. Yang, G. Liu, M. Avdeev, X. Yao, *Mater. Today Energy*, 2021, **20**, 100691.
23. Z. Sun, Y. Zhao, Q. Ni, Y. Liu, C. Sun, J. Li, H. Jin, *Small*, 2022, **18**, 2200716.
24. C. Wang, Z. Sun, Y. Zhao, B. Wang, C. Shao, C. Sun, Y. Zhao, J. Li, H. Jin, L. Qu, *Small*, 2021, **17**, 2103819.
25. X. Wang, J. Chen, Z. Mao, D. Wang, *Chem. Eng. J.*, 2022, **427**, 130899.
26. D. Fang, Y. Li, C. Wang, R. Miao, S. Yang, Y. Zhao, Y. Ding, J. He, L. Chen, N. Li, J. Li, Y. Su, H. Jin, *Energy Storage Mater.*, 2025, **74**, 103973.
27. P. Jaschin, C. Tang, E. Wachsman, *Energy Environ. Sci.*, 2024, **17**, 727-737.
28. H. Liu, Y. Xing, N. Chen, J. Wu, Y. Li, C. Zhang, *Chem. Mater.*, 2023, **35**, 8686-8694.
29. L. Xiang, D. Jiang, Y. Gao, C. Zhang, X. Ren, L. Zhu, S. Gao, X. Zhan, *Adv. Funct. Mater.*, 2024, **34**, 2301670.
30. X. Miao, H. Wang, R. Sun, X. Ge, D. Zhao, P. Wang, R. Wang, L. Yin, *Adv. Energy Mater.*, 2021, **11**, 2003469.

31. C. Wang, H. Jin, Y. Zhao, *Small*, 2021, **17**, 2100974.
32. J. Yang, Z. Gao, T. Ferber, H. Zhang, C. Guhl, L. Yang, Y. Li, Z. Deng, P. Liu, C. Cheng, R. Che, W. Jaegermann, R. Hausbrand, Y. Huang, *J. Mater. Chem. A*, 2020, **8**, 7828-7835.
33. Y. Zhang, T. Gao, J. Yu, Y. Zhang, Y. Zhang, S. Chen, N. Xue, X. Zhang, Q. Yuan, L. Wang, W. Liu, *ACS Appl. Mater. Interfaces*, 2025, **17**, 10722-10731.
34. J. Liu, Z. Xia, Y. Chen, D. Tao, Q. Zhang, *J. Adv. Ceram.*, 2025, **14**, 9221023.
35. T. Li, B. Chen, T. Wang, C. Liu, W. Yin, Q. Mao, D. Zhou, Y. Hao, X. Liu, *Nat. Commun.*, 2025, **16**, 5668.
